# Supplementary material for: Gut microbiome and fecal metabolic alteration in systemic lupus erythematosus patients with depression
Source: PubMed Central journal article supplement (PMC9732533; doi:10.3389/fcimb.2022.1040211), 2022-11-25

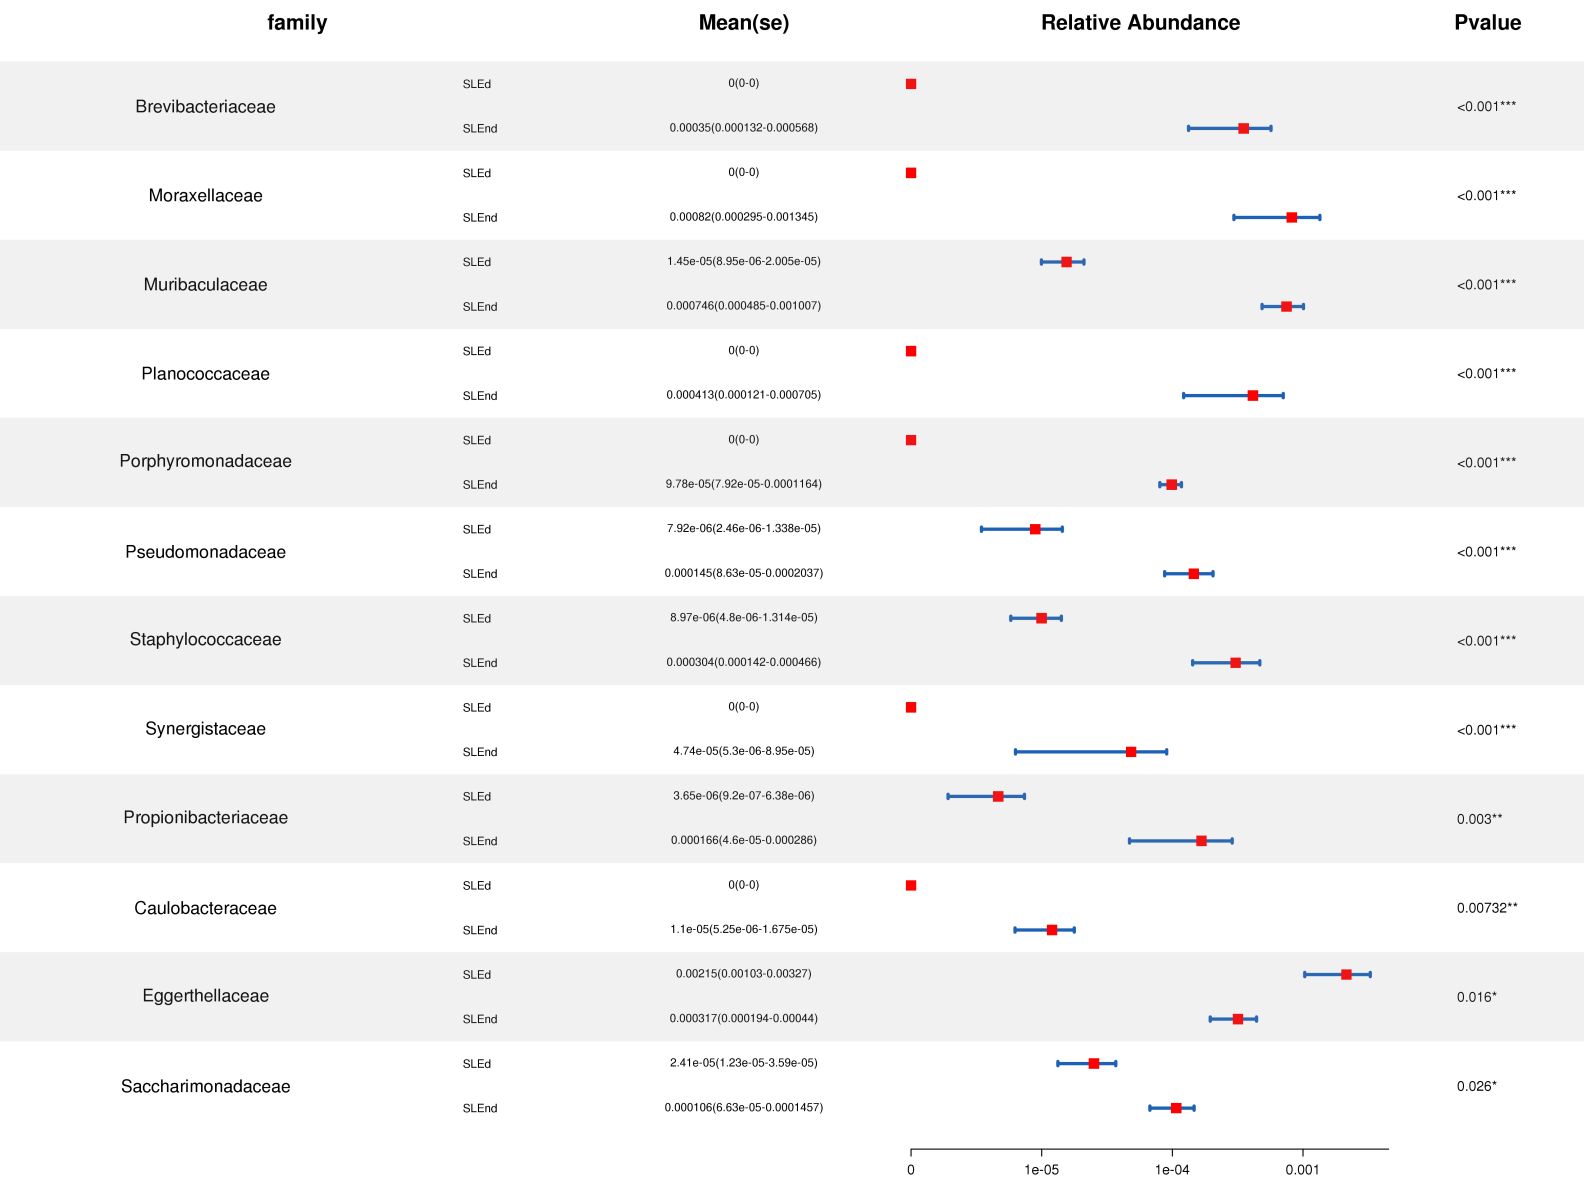

Supplement: Image_3.pdf [file Image_3.pdf]
